# Supplementary material for: Comparison of Native Escherichia coli L-Asparaginase versus Pegylated Asparaginase, in Combination with Ifosfamide, Methotrexate, Etoposide, and Prednisolone, in Extranodal NK/T-Cell Lymphoma, Nasal Type
Source: PubMed Central journal article supplement — Cancer Res Treat. 2017 Jul 3;50(3):670–80. doi: 10.4143/crt.2017.051 (PMC6056977; doi:10.4143/crt.2017.051), 2017-07-03
Supplement: crt-2017-051-suppl4.pdf [file crt-2017-051-suppl4.pdf]

**S4 Table.** Dose profile of chemotherapy

|                                       | IMEP+L<br>(n=77 cycles) | IMEP+P<br>(n=54 cycles) | p-value |
|---------------------------------------|-------------------------|-------------------------|---------|
| No. of cycles with reduced dose (%)   | 10 (13.0)               | 12 (22.2)               | 0.164   |
| Amount of dose reduction (%), mean±SD | 41.7±11.8               | 17.7±6.25               | 0.060   |
| No. of completed cycles (%)           | 62 (80.5)               | 54 (100)                | < 0.001 |

IMEP+L/P, ifosfamide, mesna, etoposide, prednisolone+L-asparaginase/peg-asparaginase;  
SD, standard deviation.
