# Supplementary material for: Comparison of Native Escherichia coli L-Asparaginase versus Pegylated Asparaginase, in Combination with Ifosfamide, Methotrexate, Etoposide, and Prednisolone, in Extranodal NK/T-Cell Lymphoma, Nasal Type
Source: PubMed Central journal article supplement — Cancer Res Treat. 2017 Jul 3;50(3):670–80. doi: 10.4143/crt.2017.051 (PMC6056977; doi:10.4143/crt.2017.051), 2017-07-03
Supplement: crt-2017-051-suppl6.pdf [file crt-2017-051-suppl6.pdf]

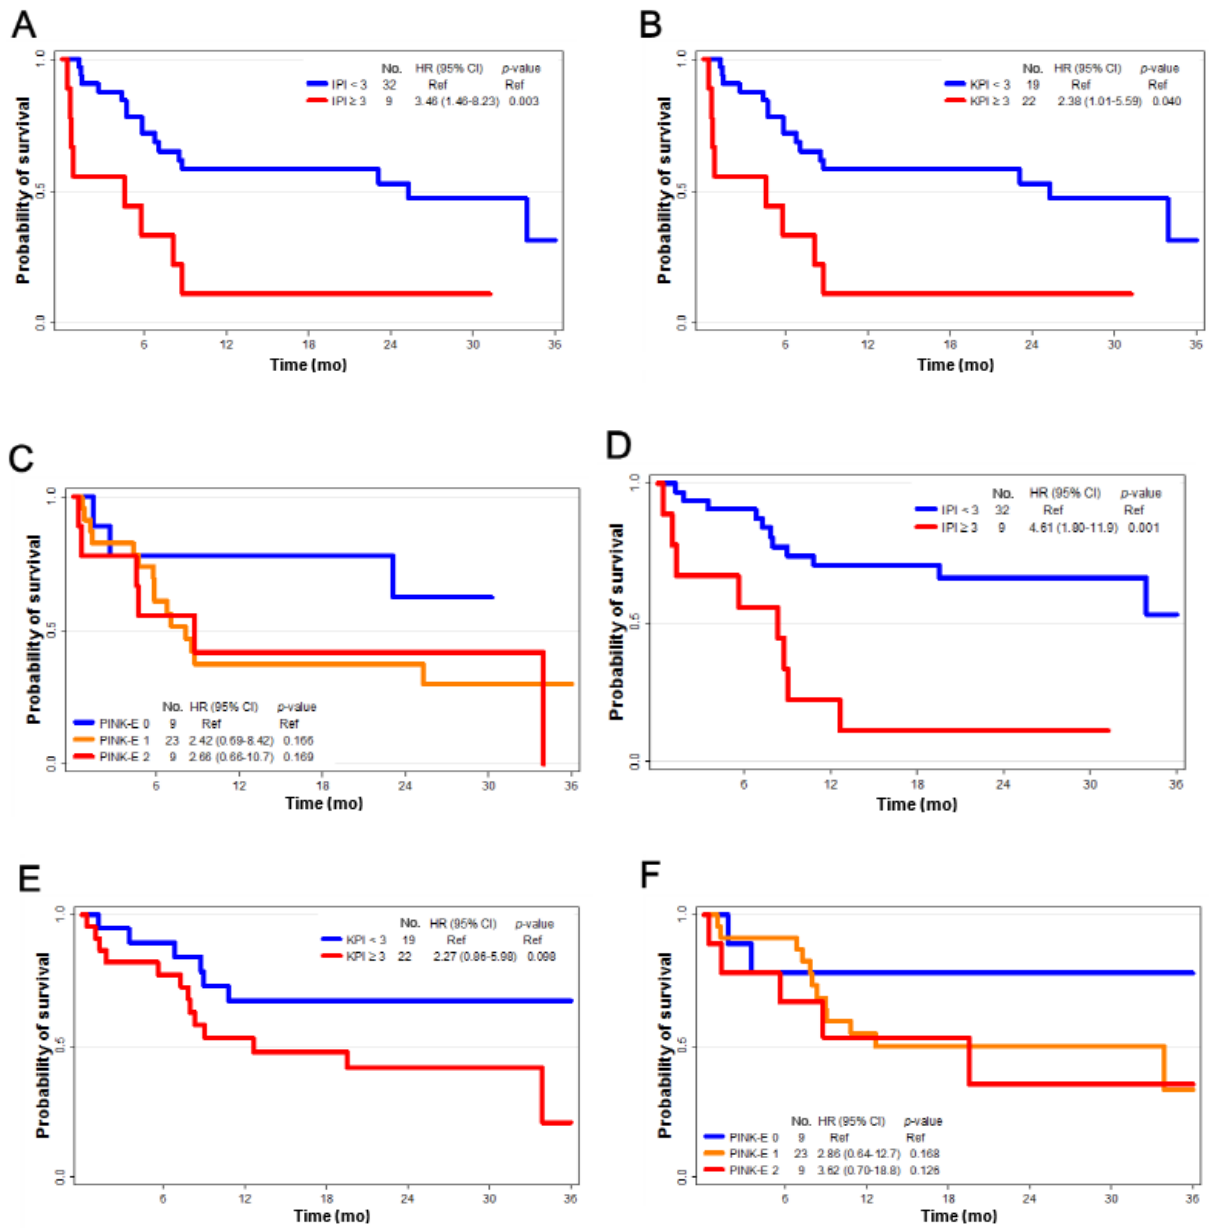

**S6 Fig.** Survival analysis of progression-free survival (A-C) and overall survival (D-F) according to the International Prognostic Index (IPI) (A, D), Korean Prognostic Index (KPI) (B, E), and PINK-Epstein-Barr virus (PINK-E) (C, F). HR, hazard ratio; CI, confidence interval.
